# Supplementary material for: Comparison of wind-farm control strategies under realistic offshore wind conditions: turbine quantities of interest
Source: Copernicus journal article supplement (doi:10.5194/wes-2024-164), 2024-12-02
Supplement: Supplementary file [file wes-2024-164-AC1-supplement.zip]

**National Renewable Energy Laboratory**  
National Wind Technology Center  
19001 W 119<sup>th</sup> Ave  
Arvada, Colorado 80007

February 6, 2025

Subject: Response to reviewers, manuscript WES-2024-164

Dear prof. Meyers,

On behalf of the authors, I would like to thank the reviewers for their thorough review of our manuscript and their constructive feedback. We have done our best to address the concerns raised by the reviewers in the revised manuscript.

All the comments raised by the reviewers are addressed individually in the Response to Reviewers document. Furthermore, we have included an updated manuscript, as well as a file showing the changes made to the manuscript. We believe that this manuscript is now suitable for publication in *Wind Energy Science*.

We thank you for your efforts in editing this publication and look forward to hearing from you in due course.

Sincerely,

On behalf of all the authors,

Dr. Joeri Frederik  
Postdoctoral researcher
